# Supplementary material for: Distinct Trends of DNA Methylation Patterning in the Innate and Adaptive Immune Systems
Source: PubMed Central journal article supplement (PMC5889099; doi:10.1016/j.celrep.2016.10.054), 2016-11-15
Supplement: NIHMS76881-supplement-Supplemental_information.pdf [file NIHMS76881-supplement-Supplemental_information.pdf]

## Supplemental Information

### **Distinct Trends of DNA Methylation Patterning in the Innate and Adaptive Immune Systems**

**Ronald P. Schuyler, Angelika Merkel, Emanuele Raineri, Lucia Altucci, Edo Vellenga, Joost H.A. Martens, Farzin Pourfarzad, Taco W. Kuijpers, Frances Burden, Samantha Farrow, Kate Downes, Willem H. Ouwehand, Laura Clarke, Avik Datta, Ernesto Lowy, Paul Flicek, Mattia Frontini, Hendrik G. Stunnenberg, José I. Martín-Subero, Ivo Gut, and Simon Heath**

## SUPPLEMENTAL FIGURES AND TABLE

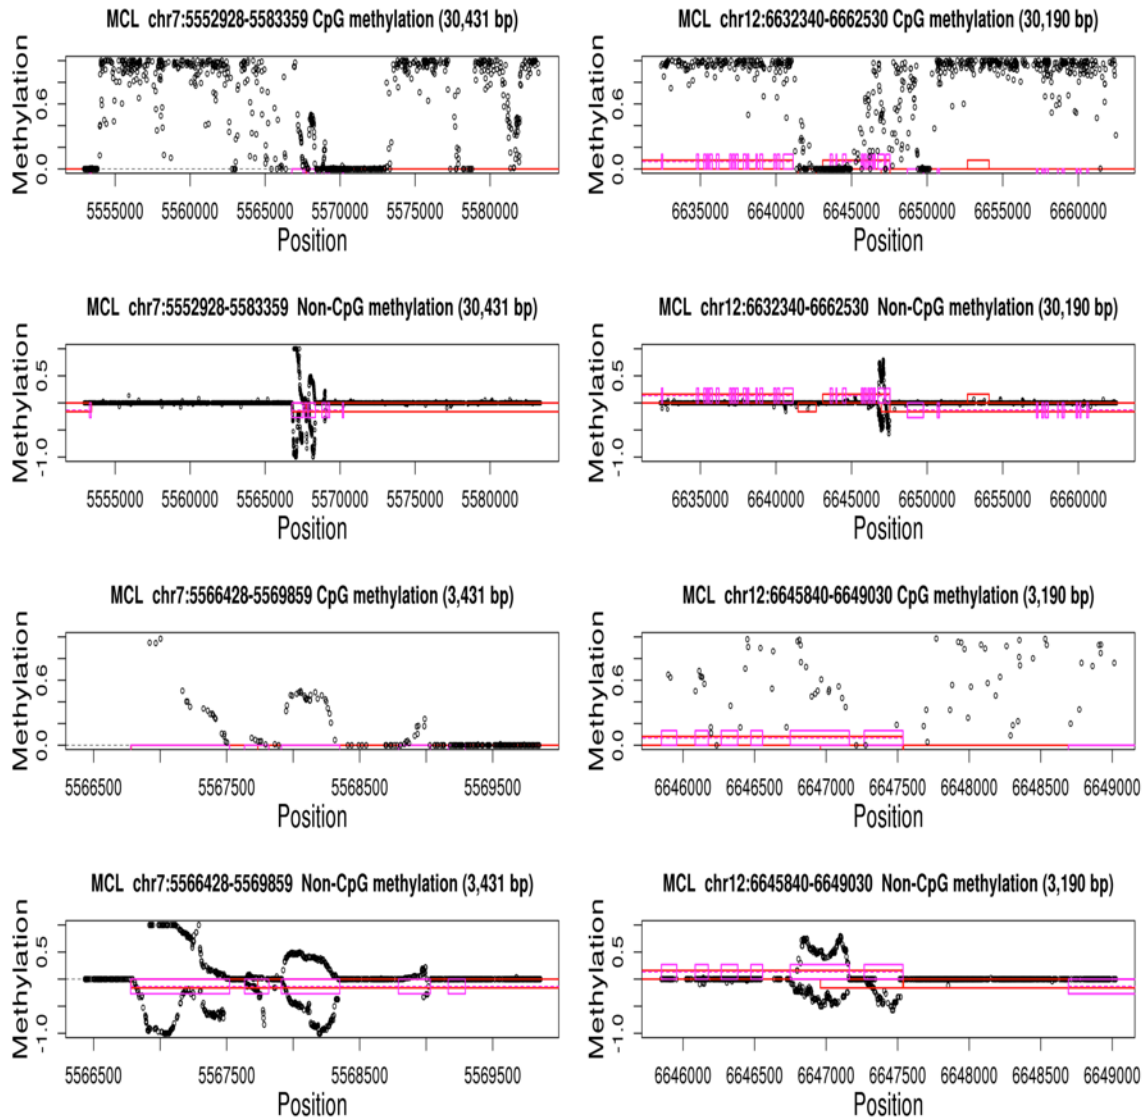

**Figure S1.** Related to Figure 3. Examples of mCH-marked exons at transitions in CG methylation level. Two examples are shown (left and right columns), each at two resolutions (30k bp and 3.4k bp) to show the mCG transition and the exon specificity, respectively. Each mCG plot is directly above the corresponding mCH plot, as indicated in the figure. Negative values indicate mCH on the minus strand. Exons are shown as blue boxes, above (plus strand) or below (minus strand) the line  $y=0$ .

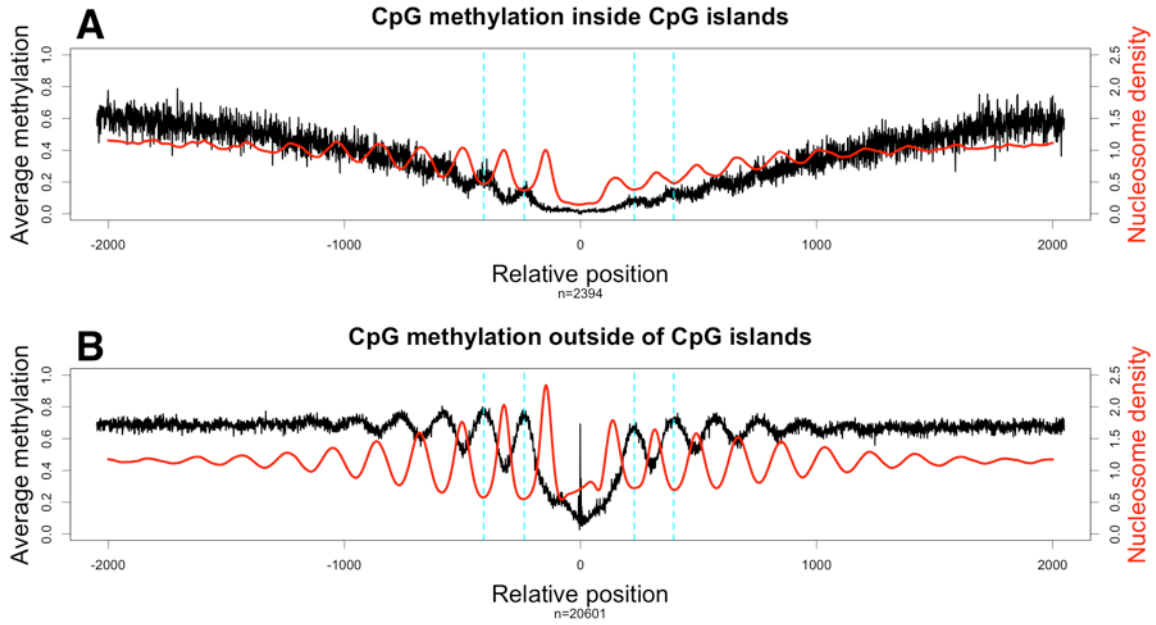

**Figure S2.** Related to Figure 4. Methylation and nucleosome occupancy at cCTCF binding sites (A) within (n=2394) and (B) outside (n=20601) of CpG islands. Amplitude of both signals is lower within CpG islands, but the phase is the same (dashed vertical lines). Methylation in a plasma cell, nucleosome density in lymphoid cell line GM12878.

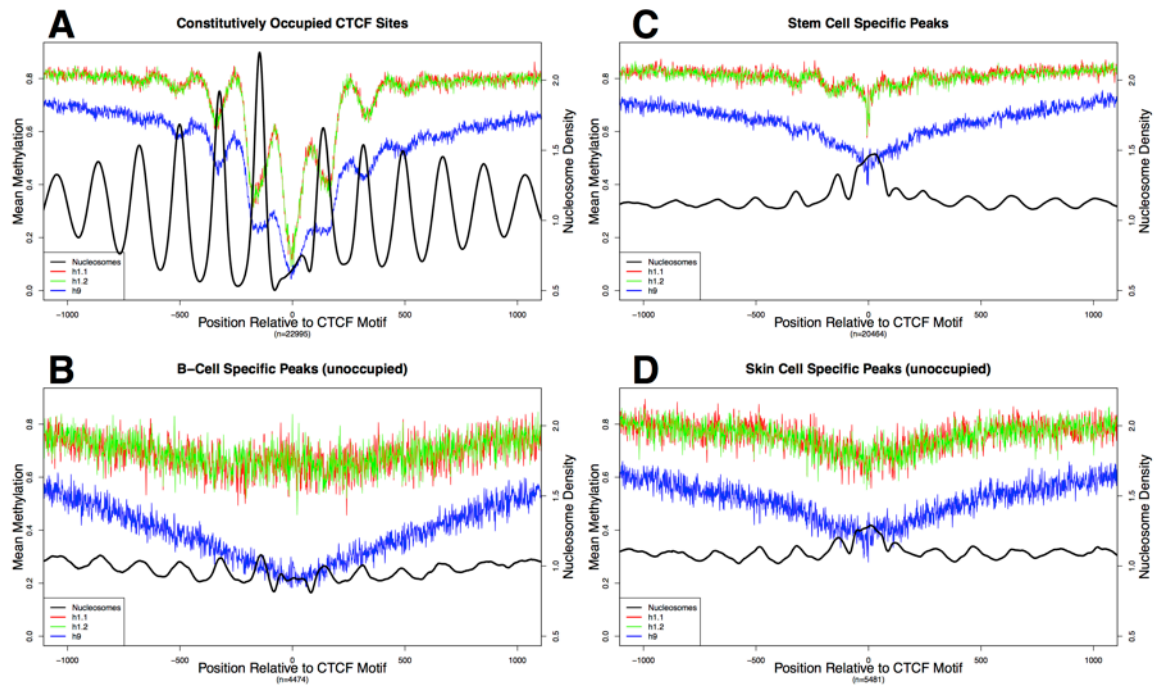

**Figure S3.** Related to Figure 4. DNA methylation levels in stem cell lines H1 (two replicates; red and green) and H9 (blue) at CTCF binding sites. (A) Constitutively occupied (cCTCF), specifically occupied in (B) lymphoblastoid cell line (unoccupied in stem cells), (C) stem cell line (occupied), (D) skin cell line (unoccupied in stem cells). Nucleosome density (black) from lymphoblastoid cell line.

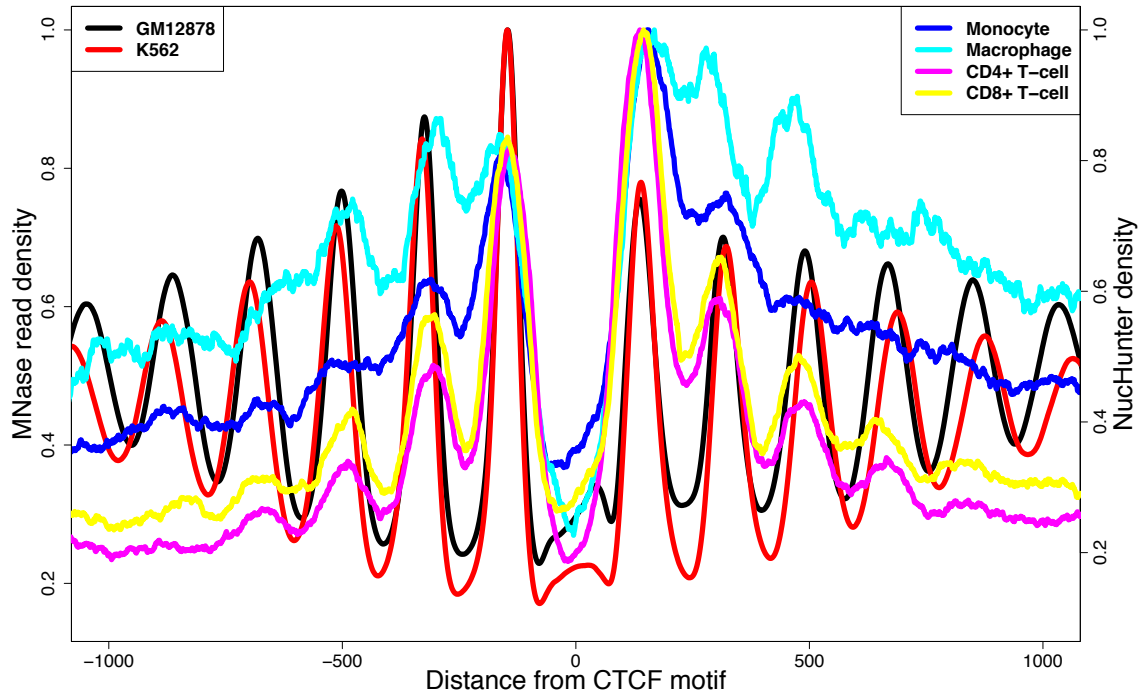

**Figure S4.** Related to Figure 4A . Nucleosome positioning at constitutively occupied CTCF sites. Positions derived from histone ChIP-seq in Blueprint primary samples (monocyte, blue; macrophage, aqua; and naïve T cells (CD4<sup>+</sup>, pink; CD8<sup>+</sup>, yellow)) are spatially consistent with those derived from MNase data in ENCODE cell lines (GM12878, lymphoid, black; and K562, myeloid, red).

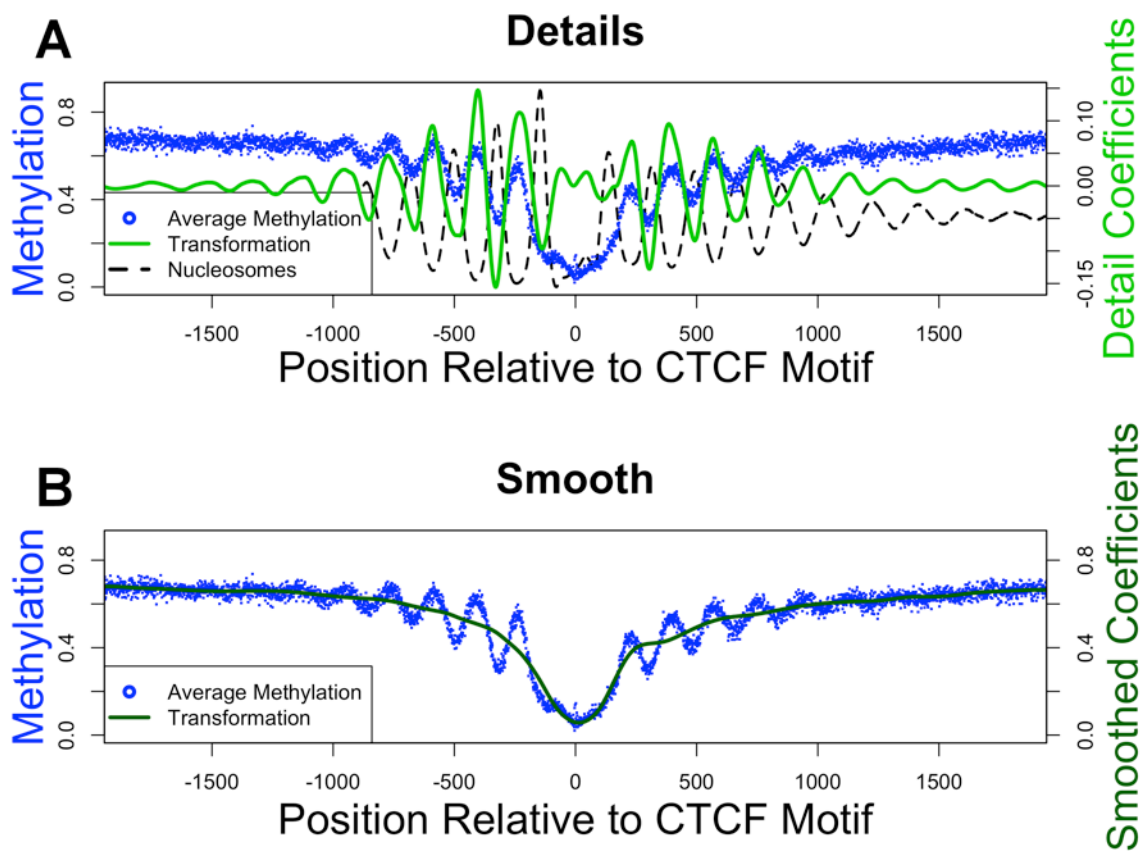

**Figure S5.** Related to Figure 6. Measurement of nucleosome influence on DNA methylation (oscillation amplitude). The methylation signal (blue) is split into distinct components (green). (A) Maximum and minimum positions relative to the CTCF motif are determined from the wavelet transformation details (light green). Oscillation amplitude is determined from the original (untransformed) signal in a 10 bp window at these two points. (B) Smoothed component of the signal (dark green) reflects low methylation levels near CTCF. Black dashed line: nucleosome density.

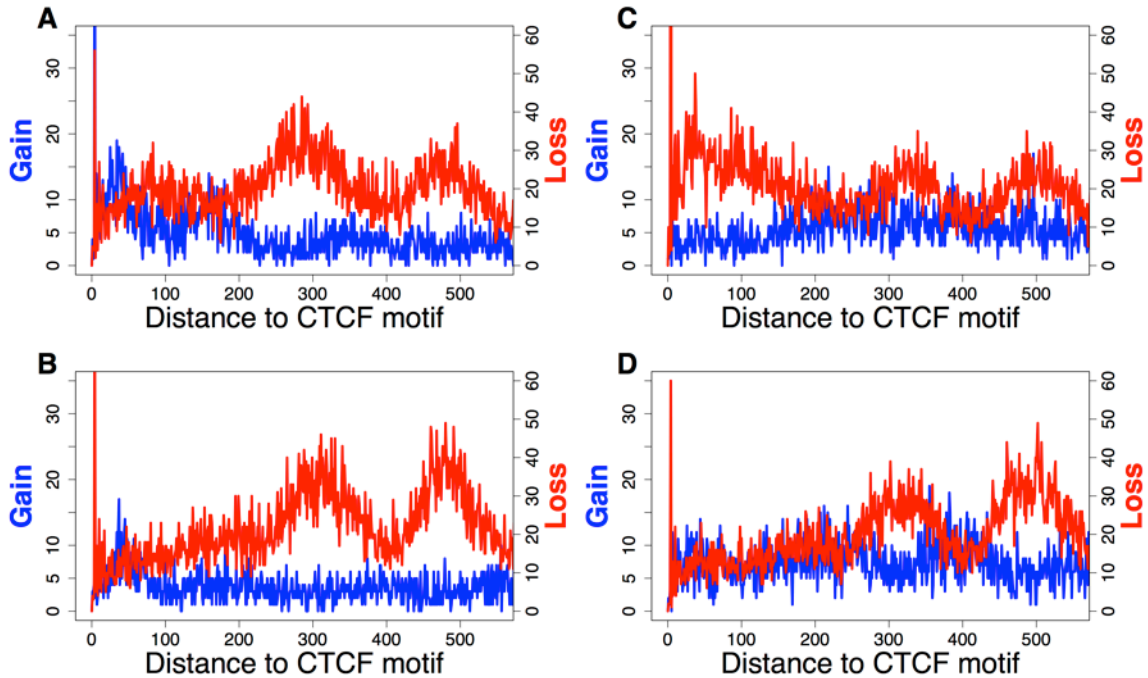

**Figure S6.** Related to Figures 4A and 6A. Gain (blue) and loss (red) of CG methylation between lymphocyte developmental stages occur in counterphase, reflecting nucleosome positions. Counts of statistically significant changes in methylation at CGs (chi-square or Fisher's exact test) are plotted as a function of distance to the nearest CTCF binding site for each comparison of B cell stages. (A) Pre-B to naïve B cell. (B) Naïve B cell to germinal center B cell. (C) Germinal center B cell to memory B cell. (D) Memory B cell to plasma cell.

**Table S1.** Cancer sample source material.

| Sample ID | Disease                      | Type of cell            | Source           | Purification                       | Karyotype | Purity of tumor cells | Reference                                      |
|-----------|------------------------------|-------------------------|------------------|------------------------------------|-----------|-----------------------|------------------------------------------------|
| CLL-3     | Chronic lymphocytic leukemia | Neoplastic B cell       | Peripheral Blood | FACS (CD19+)                       |           | >95%                  | Kulis et al., Nat Genet 2012, PMID: 23064414   |
| CLL-16    | Chronic lymphocytic leukemia | Neoplastic B cell       | Peripheral Blood | FACS (CD19+)                       |           | >95%                  | Kulis et al., Nat Genet 2012, PMID: 23064414   |
| MM-35574  | Multiple myeloma             | Neoplastic plasma cell  | Bone marrow      | FACS (CD138+)                      |           | >90%                  | Agirre et al., Genome Res 2015, PMID: 26437030 |
| MM-35174  | Multiple myeloma             | Neoplastic plasma cell  | Bone marrow      | FACS (CD138+)                      |           | >90%                  | Agirre et al., Genome Res 2015, PMID: 26437030 |
| MCL-568   | Mantle cell lymphoma         | Neoplastic B cell       | Lymph node       | Not purified                       |           | >90%                  | Queiros et al., submitted                      |
| MCL-828   | Mantle cell lymphoma         | Neoplastic B cell       | Peripheral Blood | FACS (CD19+)                       |           | >90%                  | Queiros et al., submitted                      |
| S004XMA1  | Acute promyelocytic leukemia | Neoplastic myeloid cell | Bone marrow      | Not purified                       | t(15;17)  |                       | Petraglia et al., submitted                    |
| S0050AA1  | Acute promyelocytic leukemia | Neoplastic myeloid cell | Bone marrow      | Not purified, ex vivo ATRA treated | t(15;17)  |                       | Petraglia et al., submitted                    |
| S005FHA1  | Acute myeloid leukemia       | Neoplastic myeloid cell | Bone marrow      | FACS (CD33+)                       | NK        |                       | Yi et al., submitted                           |
| S008QKA1  | Acute promyelocytic leukemia | Neoplastic myeloid cell | Bone marrow      | Not purified                       | t(15;17)  |                       | Petraglia et al., submitted                    |
| S008X6A1  | Acute myeloid leukemia       | Neoplastic myeloid cell | Bone marrow      | Not purified                       | NK        |                       | Yi et al., submitted                           |
| S00CWTA1  | Acute myeloid leukemia       | Neoplastic myeloid cell | Venous blood     | FACS (CD33+)                       | NK        |                       | Yi et al., submitted                           |
| S00CXRA1  | Acute myeloid leukemia       | Neoplastic myeloid cell | Bone marrow      | FACS (CD33+)                       | NK        |                       | Yi et al., submitted                           |
| S00CYPA1  | Acute myeloid leukemia       | Neoplastic myeloid cell | Bone marrow      | FACS (CD33+)                       | NK        |                       | Yi et al., submitted                           |
| S00D1DA1  | Acute myeloid leukemia       | Neoplastic myeloid cell | Venous blood     | FACS (CD33+)                       | NK        |                       | Yi et al., submitted                           |
| S00D39A1  | Acute myeloid leukemia       | Neoplastic myeloid cell | Venous blood     | FACS (CD33+)                       | NK        |                       | Yi et al., submitted                           |
